# Supplementary material
Source: PubMed Central journal article supplement (PMC3637730)
Supplement: 1219542110_pnas.201219542SI.pdf [file 1219542110_pnas.201219542SI.pdf]

# Supporting Information

Zheng et al. 10.1073/pnas.1219542110

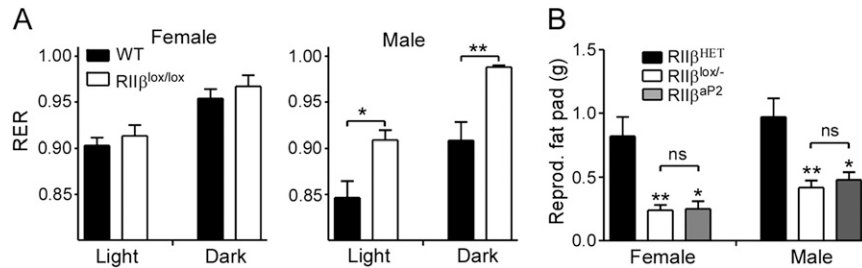

**Fig. S1.** Respiratory exchange ratio and additional fat-pad data on aP2-Cre/RIIβ<sup>lox/lox</sup> mice. (A) Respiratory exchange ratio (RER) of WT and RIIβ<sup>lox/lox</sup> mice during light and dark phases was measured over 2 d and averaged. For both sexes,  $n = 8$  for each genotype; values represent mean  $\pm$  SEM. \*\* $P < 0.01$ . (B) Weight of reproductive fat pads in heterozygote (HET) ( $n = 15$  for male and 16 for female), RIIβ<sup>lox/-</sup> ( $n = 14$  for male and 13 for female), and RIIβ<sup>aP2</sup> ( $n = 9$  for male and 8 for female) mice. Values represent mean  $\pm$  SEM \*\*\* $P < 0.001$  compared with HET.

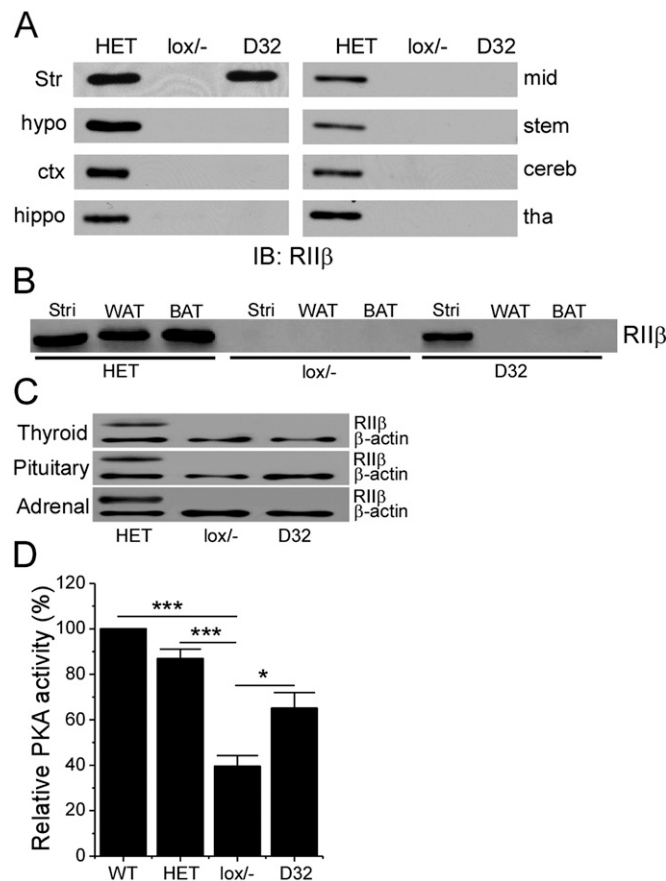

**Fig. S2.** Specificity of D32-Cre-induced RIIβ expression and the effect on protein kinase A (PKA) activity in the striatum. (A–C) Immunoblots of RIIβ in different brain regions and periphery tissues, including brown adipose tissue (BAT), white adipose tissue (WAT), pituitary, thyroid, and adrenal glands of HET, RIIβ<sup>lox/-</sup>, and RIIβ<sup>D32</sup> mice. (D) Total PKA activity (in presence of 5  $\mu$ M cAMP) of striatal extracts from WT, HET, RIIβ<sup>lox/-</sup>, and RIIβ<sup>D32</sup> mice. \* $P < 0.05$ , \*\*\* $P < 0.001$ .
